# Supplementary material for: Spontaneous electric polarization and electric field gradient in hybrid improper ferroelectrics: insights and correlations
Source: Royal Society of Chemistry journal article supplement (doi:10.1039/d1tc00989c), 2021-01-01
Supplement: d1tc00989c1.pdf [file d1tc00989c1.pdf]

# Spontaneous electric polarization and electric field gradient in hybrid improper ferroelectrics: insights and correlations

S. S. M. Santos, M. L. Marcondes, I. P. Miranda, P. Rocha-Rodrigues, A. M. L. Lopes, L. V. C. Assali, H. M. Petrilli, and J. P. Araújo

## Supplementary information

Figure S1 shows the asymmetry parameter ( $\eta$ ) as a function of the spontaneous electric polarization squared ( $P^2$ ) for the  $\text{Ca}_3\text{Mn}_2\text{O}_7$  system. At  $P = 0$  the data correspond to the paraelectric  $Cmcm$  and  $Cmce$  phases and at  $P^2 = 26.94 (\mu\text{C}/\text{cm}^2)^2$  to the ferroelectric  $A2_1am$  phase.

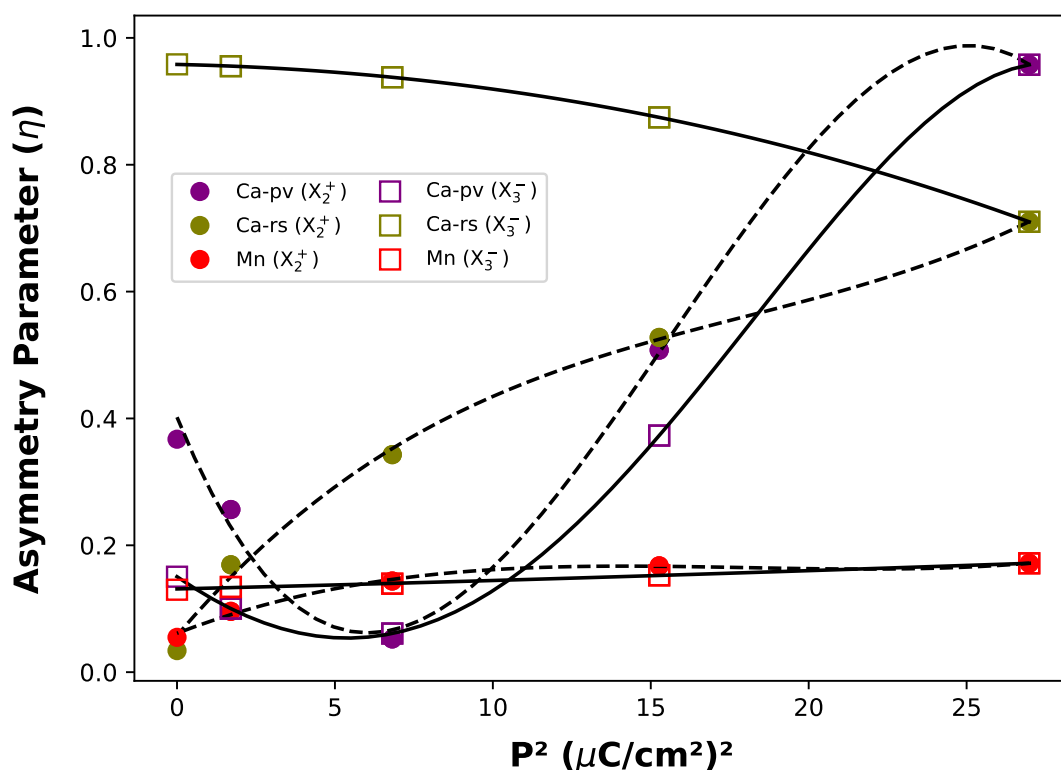

Figure S1: Asymmetry parameter ( $\eta$ ) for the  $\text{Ca}_3\text{Mn}_2\text{O}_7$  system at sites A (Ca-pv), A' (Ca-rs), and B (Mn atom).

Figures S2, S3, and S4 show, respectively, the  $g(\theta, \phi)$  surface plot of the  $\text{Ca}_3\text{Ti}_2\text{O}_7$ ,  $\text{Cd}_3\text{Mn}_2\text{O}_7$ , and  $\text{Cd}_3\text{Ti}_2\text{O}_7$  systems.

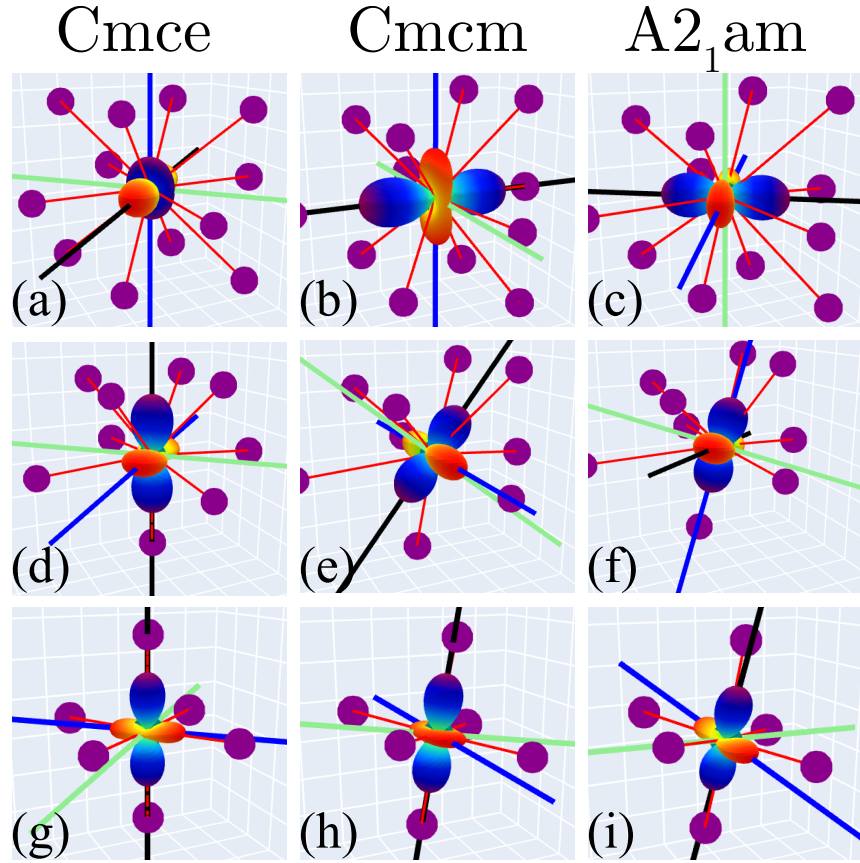

Figure S2:  $g(\theta, \phi)$  surface plot of the  $\text{Ca}_3\text{Ti}_2\text{O}_7$  compound for the polar  $A2_1am$ , and the centrosymmetric  $Cmmm$  and  $Cmce$  space groups along the  $X_2^+$  and  $X_3^-$  paths, respectively. (a-c) at Ca rs-site ( $A'$ -site), (d-f) at Ca pv-site ( $A$ -site), and (g-i) at Ti-site ( $B$ -site). The green, blue, and black axes represent the directions of the  $V_{xx}$ ,  $V_{yy}$ , and  $V_{zz}$  EFG components, respectively. Blue color regions depict where the polar function is negative and red color regions where it is positive.

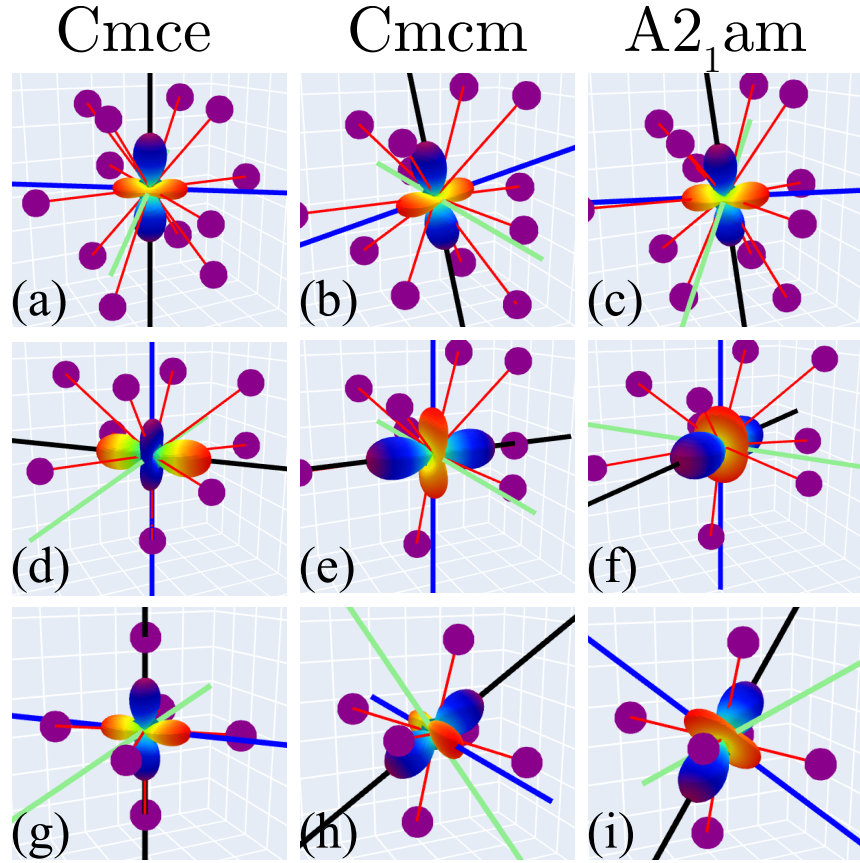

Figure S3:  $g(\theta, \phi)$  surface plot of the  $\text{Cd}_3\text{Mn}_2\text{O}_7$  compound for the polar  $A2_1am$ , and the centrosymmetric  $Cmcm$  and  $Cmce$  space groups along the  $X_2^+$  and  $X_3^-$  paths, respectively. (a-c) at Cd rs-site ( $A'$ -site), (d-f) at Cd pv-site ( $A$ -site), and (g-i) at Mn-site ( $B$ -site). The green, blue, and black axes represent the directions of the  $V_{xx}$ ,  $V_{yy}$ , and  $V_{zz}$  EFG components, respectively. Blue color regions depict where the polar function is negative and red color regions where it is positive.

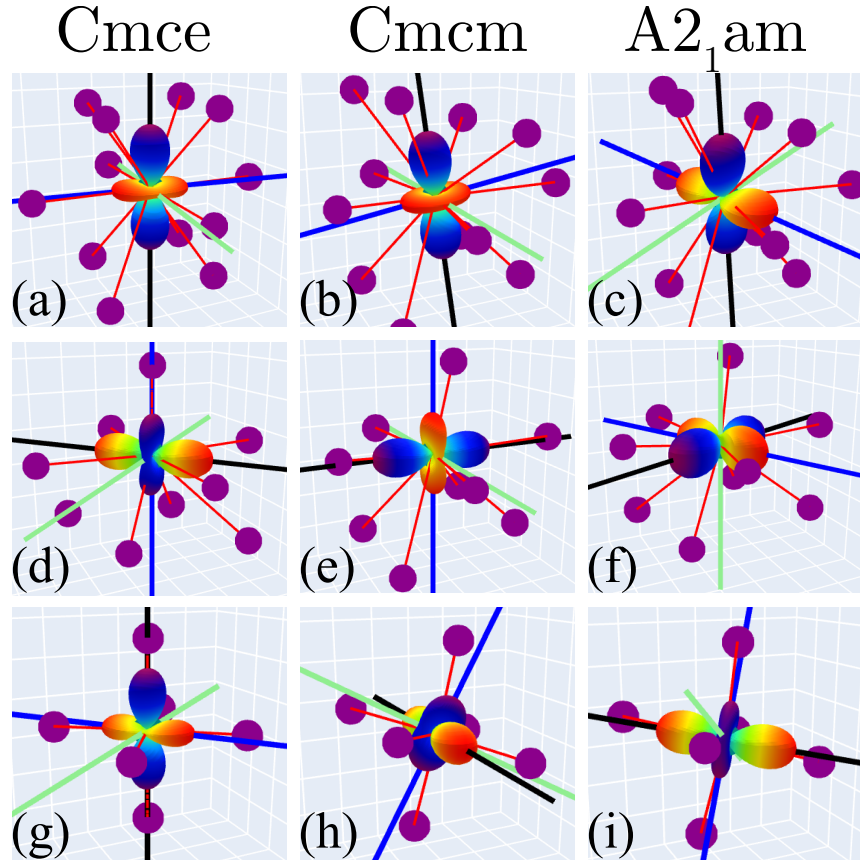

Figure S4:  $g(\theta, \phi)$  surface plot of the  $\text{Cd}_3\text{Ti}_2\text{O}_7$  compound for the polar  $A2_1am$ , and the centrosymmetric  $Cmcm$  and  $Cmce$  space groups along the  $X_2^+$  and  $X_3^-$  paths, respectively. (a-c) at Cd rs-site ( $A'$ -site), (d-f) at Cd pv-site ( $A$ -site), and (g-i) at Ti-site ( $B$ -site). The green, blue, and black axes represent the directions of the  $V_{xx}$ ,  $V_{yy}$ , and  $V_{zz}$  EFG components, respectively. Blue color regions depict where the polar function is negative and red color regions where it is positive.
